# Supplementary material
Source: publisher site journal article supplement (https://www.dovepress.com/get_supplementary_file.php?f=232849.docx)
Supplement: Supplementary file 1 [file get_supplementary_file.php]

**Supplementary Table S1. Diagnostic sensitivity and specificity of NLR, MLR, PLR, CA125 and combined markers in differentiating endometriosis from other benign ovarian tumors**

|  | AUC(95%CI) | Sensitivity,% | Specifity,% | Cut off value | *p* |
| --- | --- | --- | --- | --- | --- |
| NLR | 0.56(0.50-0.62) | 32.90 | 80.20 | 2.26 | 0.047 |
| MLR | 0.51(0.45-0.57) | 7.10 | 97.90 | 0.35 | 0.729 |
| PLR | 0.59(0.54-0.66) | 56.00 | 62.50 | 146.15 | 0.002 |
| CA125 | **0.86(0.81-0.91)** | **80.60** | **85.40** | 27.03 | 0.000 |
| NLR*CA125 | 0.85(0.80-0.90) | 81.30 | 84.40 | 46.42 | 0.000 |
| PLR*CA125 | **0.86(0.81-0.91)** | **85.10** | **82.30** | 3477.90 | 0.000 |

**Supplementary Table S2. Diagnostic sensitivity and specificity of NLR, MLR, PLR, CA125 and combined markers in differentiating endometriosis from healthy control**

|  | AUC(95%CI) | Sensitivity,% | Specifity,% | Cut off value | *p* |
| --- | --- | --- | --- | --- | --- |
| NLR | 0.63(0.54-0.65) | 50.20 | 73.30 | 1.86 | 0.004 |
| MLR | 0.65(0.46-0.58) | 45.80 | 82.20 | 0.18 | 0.001 |
| PLR | 0.72(0.57-0.69) | 72.50 | 66.70 | 126.59 | 0.000 |
| CA125 | 0.98(0.89-0.95) | 94.70 | 93.30 | 15.66 | 0.000 |
| NLR*CA125 | 0.97(0.89-0.94) | 95.00 | 88.90 | 26.01 | 0.000 |
| MLR*CA125 | 0.96(0.95-0.98) | 94.10 | 88.90 | 2.56 | 0.000 |
| PLR*CA125 | 0.97(0.95-0.99) | 94.30 | 88.90 | 2745.68 | 0.000 |

**Supplementary Table S3. Diagnostic sensitivity and specificity of the Lymphocyte, Platelet, PLR in endometriosis patients** **complicated with endometrioma (OMA)**

|  | AUC(95%CI) | Sensitivity,% | Specifity,% | Cut off value | *p* |
| --- | --- | --- | --- | --- | --- |
| L | 0.45(0.35-0.55) | 28.00 | 88.00 | 2.93 | 0.286 |
| P | **0.69(0.61-0.78)** | **77.80** | **56.60** | **265.50** | **0.000** |
| PLR | **0.66(0.57-0.76)** | **75.00** | **54.20** | **153.31** | **0.001** |

**Supplementary Table S4. Diagnostic sensitivity and specificity of the Lymphocyte, Platelet, PLR in endometriosis patients complicated with hysteromyoma**

|  | AUC(95%CI) | Sensitivity,% | Specifity,% | Cut off value | *p* |
| --- | --- | --- | --- | --- | --- |
| L | 0.44(0.39-0.49) | 99.20 | 6.00 | 0.67 | 0.042 |
| P | **0.56(0.50-0.61)** | **50.40** | **60.70** | **270.50** | **0.044** |
| PLR | **0.59(0.53-0.64)** | **61.60** | **54.80** | **154.14** | **0.002** |
